# Supplementary material for: Anomalies in the low frequency vibrational density of states for a polymer with intrinsic microporosity – the Boson peak of PIM-1
Source: Royal Society of Chemistry journal article supplement (doi:10.1039/c7cp07141h), 2017-12-14
Supplement: c7cp07141h1.pdf [file c7cp07141h1.pdf]

## **Supplementary Information**

### **Anomalies in the Low Frequency Vibrational Density of States for a Polymer with Intrinsic Microporosity – The Boson Peak of PIM-1**

Reiner Zorn<sup>1</sup>, Huajie Yin<sup>2</sup>, Wiebke Lohstroh<sup>3</sup>, Wayne Harrison<sup>4</sup>, Peter M. Budd<sup>4</sup>, Brian R.  
Pauw<sup>2</sup>, Martin Böhning<sup>2</sup>, Andreas Schönhals<sup>2,\*</sup>

<sup>1</sup>Jülich Centre for Neutron Science JCNS and Institute for Complex Systems ICS,  
Forschungszentrum Jülich, 52425 Jülich, Germany

<sup>2</sup>Bundesanstalt für Materialforschung und -prüfung (BAM), Unter den Eichen 87, 12205  
Berlin, Germany.

<sup>3</sup>Heinz Maier-Leibnitz Zentrum (MLZ), Technische Universität München, Lichtenbergstraße  
1, 85748 Garching, Germany

<sup>4</sup>The University of Manchester, School of Chemistry, Manchester M13 9PL, United Kingdom

## Calculation of the neutron cross sections per monomer

**Table S1.** Calculation of the neutron cross sections per monomer (coherent scattering, incoherent scattering and absorption) for PIM-1. 1 barn =  $10^{-24}$  cm<sup>2</sup>. The first column of each type of cross section contains the tabulated bound cross section for a single nucleus. The second column shows the contribution of all atoms of that type in the monomer. Absorption cross sections are scaled to the wavelength actually used, 5 Å, from the tabulated reference, 1.8 Å.

| Atom    | Number | $\sigma_{\text{coh}}$ [barn] |        | $\sigma_{\text{inc}}$ [barn] |         | $\sigma_{\text{abs}}$ [barn] |       |
|---------|--------|------------------------------|--------|------------------------------|---------|------------------------------|-------|
| C       | 29     | 5.551                        | 160.98 | 0.001                        | 0.03    | 0.0035                       | 0.28  |
| H       | 22     | 1.7568                       | 38.65  | 80.26                        | 1765.72 | 0.3326                       | 20.33 |
| O       | 4      | 4.232                        | 16.93  | 0.0008                       | 0.003   | 0.00019                      | 0.002 |
| N       | 2      | 11.01                        | 22.02  | 0.50                         | 1.00    | 1.90                         | 10.56 |
| Monomer |        |                              | 238.58 |                              | 1766.75 |                              | 31.17 |

**Table S2.** Calculation of the macroscopic neutron cross sections (coherent scattering, incoherent scattering and absorption) for PIM-1.

|                                           |        |
|-------------------------------------------|--------|
| Mass density [g/cm <sup>3</sup> ]         | 1.210  |
| Monomer mass [g/mol]                      | 462.51 |
| Monomer density [nm <sup>-3</sup> ]       | 1.5755 |
| $\Sigma_{\text{coh}}$ [mm <sup>-1</sup> ] | 0.0376 |
| $\Sigma_{\text{inc}}$ [mm <sup>-1</sup> ] | 0.2783 |
| $\Sigma_{\text{sca}}$ [mm <sup>-1</sup> ] | 0.3159 |
| $\Sigma_{\text{abs}}$ [mm <sup>-1</sup> ] | 0.0049 |
| $\Sigma_{\text{tot}}$ [mm <sup>-1</sup> ] | 0.3208 |

**Table S3.** Calculation of the neutron cross sections per monomer (coherent scattering, incoherent scattering and absorption) for Matrimid. 1 barn =  $10^{-24}$  cm<sup>2</sup>. The first column of each type of cross section contains the tabulated bound cross section for a single nucleus. The second column shows the contribution of all atoms of that type in the monomer. Absorption cross sections are scaled to the wavelength actually used, 5 Å, from the tabulated reference, 1.8 Å.

| Atom    | Number | $\sigma_{\text{coh}}$ [barn] |        | $\sigma_{\text{inc}}$ [barn] |         | $\sigma_{\text{abs}}$ [barn] |       |
|---------|--------|------------------------------|--------|------------------------------|---------|------------------------------|-------|
| C       | 35     | 5.551                        | 194.29 | 0.001                        | 0.04    | 0.0035                       | 0.34  |
| H       | 26     | 1.7568                       | 45.68  | 80.26                        | 2086.76 | 0.3326                       | 24.02 |
| O       | 5      | 4.232                        | 21.16  | 0.0008                       | 0.004   | 0.00019                      | 0.003 |
| N       | 2      | 11.01                        | 22.02  | 0.50                         | 1.00    | 1.90                         | 10.56 |
| Monomer |        |                              | 238.14 |                              | 2087.80 |                              | 34.92 |

**Table S4.** Calculation of the macroscopic neutron cross sections (coherent scattering, incoherent scattering and absorption) for Matrimid.

|                                           |        |
|-------------------------------------------|--------|
| Mass density [g/cm <sup>3</sup> ]         | 1.240  |
| Monomer mass [g/mol]                      | 554.61 |
| Monomer density [nm <sup>-3</sup> ]       | 1.3464 |
| $\Sigma_{\text{coh}}$ [mm <sup>-1</sup> ] | 0.0381 |
| $\Sigma_{\text{inc}}$ [mm <sup>-1</sup> ] | 0.2811 |
| $\Sigma_{\text{sca}}$ [mm <sup>-1</sup> ] | 0.3192 |
| $\Sigma_{\text{abs}}$ [mm <sup>-1</sup> ] | 0.0047 |
| $\Sigma_{\text{tot}}$ [mm <sup>-1</sup> ] | 0.3239 |

### Photograph of a cast PIM-1 film

**Figure S1.** Photograph of a cast PIM-1 film (approx. 70mm diameter, 200  $\mu\text{m}$  thickness)

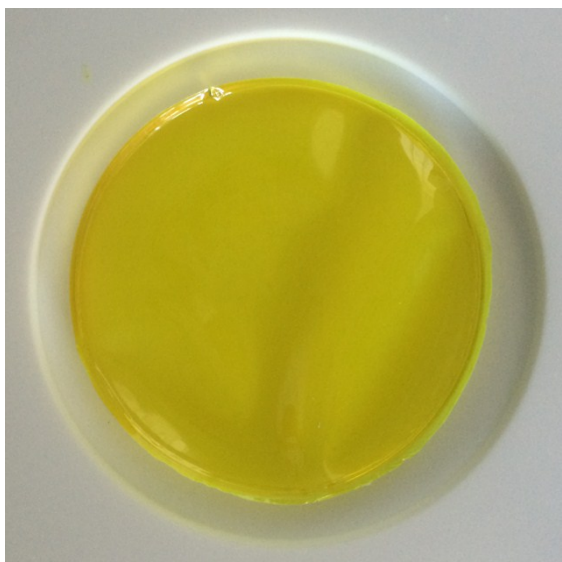

The color of a cast PIM-1 film is yellowish and not completely transparent. Furthermore the yellow color indicates that PIM-1 absorbs in the blue wave length range of the light spectrum. These properties of PIM-1 prevent Brillouin scattering experiments to measure the transverse sound velocity. Such measurements require a fully transparent sample with no absorption or fluorescence.
